# Supplementary material for: Plant triterpenoids with bond-missing skeletons: biogenesis, distribution and bioactivity
Source: Royal Society of Chemistry journal article supplement (doi:10.1039/c9np00030e), 2020-01-01
Supplement: c9np00030e1.pdf [file c9np00030e1.pdf]

## **Plant Triterpenoids with Bond-missing skeletons: Biogenesis, Distribution and Bioactivity**

### **SUPPORTING INFORMATION**

Aldo Almeida<sup>1</sup>, Lemeng Dong<sup>1</sup>, Giovanni Appendino<sup>2</sup> and Søren Bak<sup>1</sup>.

<sup>1</sup>Plant Biochemistry Laboratory, Department of Plant and Environmental Science, University of Copenhagen, DK-1871 Frederiksberg C, Denmark

<sup>2</sup>Dipartimento di Scienze del Farmaco, Università del Piemonte Orientale, Largo Donegani 2, 28100 Novara, Italy.

**Table S1: 3,4-*seco*-Cycloartane**

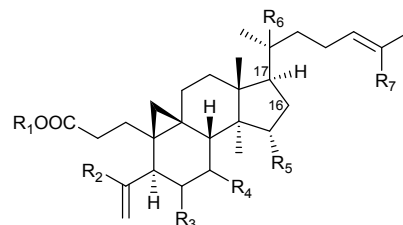

| Compound                      | R <sub>1</sub> | R <sub>2</sub>     | R <sub>3</sub>   | R <sub>4</sub> | R <sub>5</sub> | R <sub>6</sub> | R <sub>7</sub> | $\Delta^{16,17}$ | Source                                                   | Reference                                                                  |
|-------------------------------|----------------|--------------------|------------------|----------------|----------------|----------------|----------------|------------------|----------------------------------------------------------|----------------------------------------------------------------------------|
| Nigranoic acid                | H              | Me                 | H                | H              | H              | H              | COOH           | -                | <i>Schisandra nigra</i><br><i>Schisandra sphaerandra</i> | <i>Chem. Lett.</i> 1972, 725<br><i>J. Nat. Prod.</i> 1996, <b>59</b> , 525 |
| Nigranoic acid methyl ester   | Me             | Me                 | H                | H              | H              | H              | COOH           | -                | <i>Illicium verum</i>                                    | <i>Phytochemistry</i> 1998, <b>48</b> , 1169                               |
| Nigranoic acid ethyl ester    | Et             | Me                 | H                | H              | H              | H              | COOH           | -                | <i>Schisandra henry</i>                                  | <i>Chem. Nat. Comp.</i> 2010, <b>46</b> , 569                              |
| Nigranoic acid dimethyl ester | Me             | Me                 | H                | H              | H              | H              | COOH           | -                | <i>Tillandsia usneoides</i>                              | <i>Phytochemistry</i> 1995, <b>39</b> , 665                                |
| Shiglausin N                  | H              | Me                 | $\beta$ -epoxide |                | H              | H              | COOH           | -                | <i>Schisandra glaucescens</i>                            | <i>Fitoterapia</i> 2012, <b>83</b> , 926                                   |
| Shiglausin O                  | Me             | Me                 | OH               | OH             | H              | H              | COOH           | -                | <i>Schisandra glaucescens</i>                            | <i>Fitoterapia</i> 2012, <b>83</b> , 926                                   |
| Shiglausin M                  | Me             | Me                 | H                | $\beta$ -OH    | H              | H              | COOH           | -                | <i>Schisandra glaucescens</i>                            | <i>Fitoterapia</i> 2012, <b>83</b> , 926                                   |
| Angustific acid B             | H              | Me                 | H                | $\beta$ -OH    | OH             | OH             | COOH           | +                | <i>Kadsura angustifolia</i>                              | <i>Bioorg. Med. Chem. Lett.</i> 2011, <b>13</b> , 1502                     |
| Sinocalycanchinensin A        | H              | H                  | H                | H              | H              | H              | COOH           | -                | <i>Sinocalicanthus chinensis</i>                         | <i>Bioorg. Med. Chem.</i> 2011, <b>19</b> , 2790                           |
| Sinocalycanchinensin B        | Me             | H                  | H                | H              | H              | H              | COOH           | -                | <i>Sinocalicanthus chinensis</i>                         | <i>Bioorg. Med. Chem.</i> 2011, <b>19</b> , 2790                           |
| Sinocalycanchinensin E        | Pytyl          | H                  | H                | H              | H              | H              | COOH           | -                | <i>Sinocalicanthus chinensis</i>                         | <i>Bioorg. Med. Chem.</i> 2011, <b>19</b> , 2790                           |
| Coccinetane A                 | H              | Me                 | H                | H              | H              | H              | Me             | -                | <i>Kadsura coccinea</i>                                  | <i>Tetrahedron</i> 1999, <b>55</b> , 119                                   |
| Sootepin E                    | H              | Me                 | H                | H              | H              | H              | Me             | -                | <i>Gardenia sootepensis</i>                              | <i>J. Nat. Prod.</i> , 2009, <b>72</b> , 1161                              |
| Sootepin C                    | Me             | CH <sub>2</sub> OH | H                | H              | H              | H              | Me             | -                | <i>Gardenia sootepensis</i>                              | <i>J. Nat. Prod.</i> , 2009, <b>72</b> , 1161                              |
| Secaubryenol                  | H              | CH <sub>2</sub> OH | H                | H              | H              | H              | Me             | -                | <i>Gardenia aubryi</i>                                   | <i>J. Nat. Prod.</i> 2006, <b>69</b> , 1711                                |

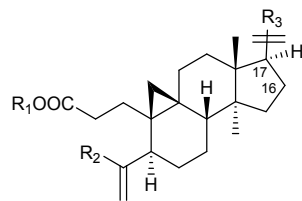

| Compound              | R <sub>1</sub> | R <sub>2</sub>     | R <sub>3</sub> | $\Delta^{16,17}$ | Source                   | Reference                                    |
|-----------------------|----------------|--------------------|----------------|------------------|--------------------------|----------------------------------------------|
| Coccinetane B         | H              | Me                 |                | -                | <i>Kadsura coccinea</i>  | <i>Tetrahedron</i> 1999, <b>55</b> , 119     |
| Coccinetane C         | H              | Me                 |                | -                | <i>Kadsura coccinea</i>  | <i>Tetrahedron</i> 1999, <b>55</b> , 119     |
| Coccinetane D         | H              | Me                 |                | -                | <i>Kadsura coccinea</i>  | <i>Tetrahedron</i> 1999, <b>55</b> , 119     |
| Coccinetane E         | H              | Me                 |                | -                | <i>Kadsura coccinea</i>  | <i>Tetrahedron</i> 1999, <b>55</b> , 119     |
| Coccinetane F         | H              | Me                 |                | -                | <i>Kadsura coccinea</i>  | <i>Tetrahedron</i> 1999, <b>55</b> , 119     |
| Coccinetane G         | H              | Me                 |                | -                | <i>Kadsura coccinea</i>  | <i>Tetrahedron</i> 1999, <b>55</b> , 119     |
| Coccinetane H         | H              | Me                 |                | -                | <i>Kadsura coccinea</i>  | <i>Tetrahedron</i> 1999, <b>55</b> , 119     |
| Securvienol           | Me             | Me                 |                | -                | <i>Gardenia urvillei</i> | <i>Phytochemistry</i> 2016, <b>122</b> , 193 |
| Secodienurvellic acid | H              | Me                 |                | -                | <i>Gardenia urvillei</i> | <i>Phytochemistry</i> 2016, <b>122</b> , 193 |
| Securvitriol          | H              | CH <sub>2</sub> OH |                | -                | <i>Gardenia urvillei</i> | <i>Phytochemistry</i> 2016, <b>122</b> , 193 |
| Secaubrytriol         | H              | CH <sub>2</sub> OH |                | -                | <i>Gardenia aubryi</i>   | <i>J. Nat. Prod.</i> 2006, <b>69</b> , 1711  |

|               |    |    |                                                                                    |   |                               |                                          |
|---------------|----|----|------------------------------------------------------------------------------------|---|-------------------------------|------------------------------------------|
| Schiglausin K | Me | Me |  | + | <i>Schisandra glaucescens</i> | <i>Fitoterapia</i> 2012, <b>83</b> , 926 |
| Schiglausin L | Me | Me |   | - | <i>Schisandra glaucescens</i> | <i>Fitoterapia</i> 2012, <b>83</b> , 926 |

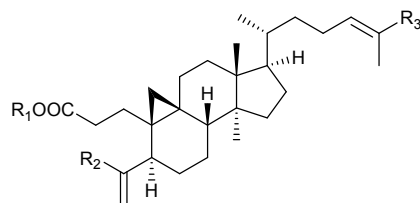

| Compound     | R <sub>1</sub> | R <sub>2</sub>     | R <sub>3</sub> | Source                      | Reference                                        |
|--------------|----------------|--------------------|----------------|-----------------------------|--------------------------------------------------|
| Sootepin D   | Me             | CH <sub>2</sub> OH | Me             | <i>Gardenia sootepensis</i> | <i>J. Nat. Prod.</i> , 2009, <b>72</b> , 1161    |
| Sootepindial | H              | CHO                | CHO            | <i>Gardenia sootepensis</i> | <i>Chem. Pharm. Bull.</i> 2012. <b>60</b> , 1538 |

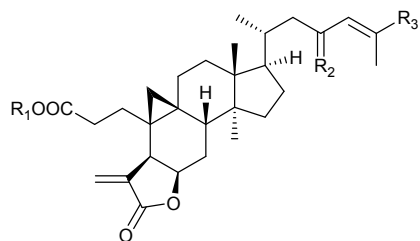

| Compound                  | R <sub>1</sub> | R <sub>2</sub> | R <sub>3</sub>     | Source                      | Reference                                        |
|---------------------------|----------------|----------------|--------------------|-----------------------------|--------------------------------------------------|
| Sootepin A                | Me             | H,H            | CH <sub>2</sub> OH | <i>Gardenia sootepensis</i> | <i>J. Nat. Prod.</i> 2009, <b>72</b> , 1161      |
| Sootepin B                | H              | H,H            | Me                 | <i>Gardenia sootepensis</i> | <i>J. Nat. Prod.</i> 2009, <b>72</b> , 1161      |
| Sootepenic acid           | Me             | H,H            | COOH               | <i>Gardenia sootepensis</i> | <i>J. Nat. Prod.</i> 2009, <b>72</b> , 1161      |
| Tubiferolide              | H              | H,H            | Me                 | <i>Gardenia sootepensis</i> | <i>Chem. Pharm. Bull.</i> 2012. <b>60</b> , 1538 |
| Tubiferolide methyl ester | Me             | H, H           | Me                 | <i>Gardenia sootepensis</i> | <i>Chem. Pharm. Bull.</i> 2012. <b>60</b> , 1538 |
| Coronalolide methyl ester | Me             | H,H            | CHO                | <i>Gardenia sootepensis</i> | <i>Chem. Pharm. Bull.</i> 2012. <b>60</b> , 1538 |

|               |    |    |    |                        |                                             |
|---------------|----|----|----|------------------------|---------------------------------------------|
| Secaubryolide | Me | =O | Me | <i>Gardenia aubryi</i> | <i>J. Nat. Prod.</i> 2006, <b>69</b> , 1711 |
|---------------|----|----|----|------------------------|---------------------------------------------|

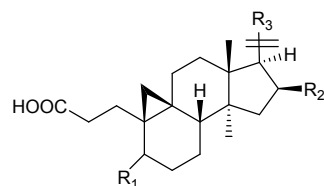

| Compound   | R <sub>1</sub> | R <sub>2</sub> | R <sub>3</sub> | Source                        | Reference                                      |
|------------|----------------|----------------|----------------|-------------------------------|------------------------------------------------|
| Neomacroin |                | OAc            |                | <i>Neoboutonia macrocalyx</i> | <i>Phytochemistry</i> , 2014, <b>102</b> , 189 |
| Ananosin E |                | H              |                | <i>Kadsura ananosma</i>       | <i>Phytochemistry</i> , 2015, <b>109</b> , 36  |

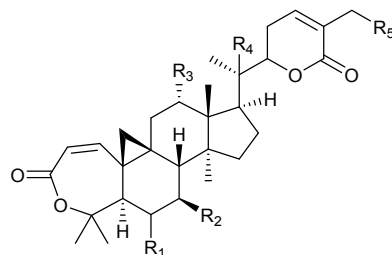

| Compound             | R <sub>1</sub> | R <sub>2</sub> | R <sub>3</sub> | R <sub>4</sub> | R <sub>5</sub> | Source                         | Reference                                               |
|----------------------|----------------|----------------|----------------|----------------|----------------|--------------------------------|---------------------------------------------------------|
| Renchanglactone A    | β-OH           | H              | H              | OH             | H              | <i>Kadsura renchangiana</i>    | <i>Nat. Prod. Res.</i> , 2008, <b>22</b> , 203          |
| Angustifodilactone A | α-OH           | H              | OH             | OH             | H              | <i>Kadsura angustifolia</i>    | <i>Bioorg. Med. Chem. Lett.</i> , 2011, <b>21</b> , 961 |
| Angustifodilactone B | α-OH           | H              | OH             | OH             | OH             | <i>Kadsura angustifolia</i>    | <i>Bioorg. Med. Chem. Lett.</i> , 2011, <b>21</b> , 961 |
| Schisanbilactone A   | β-OAc          | H              | H              | H              | H              | <i>Schisandra bicolor</i>      | <i>Helv. Chim. Acta</i> , 2009, <b>92</b> , 2086        |
| Schisanbilactone B   | β-OH           | H              | H              | OH             | H              | <i>Schisandra bicolor</i>      | <i>Helv. Chim. Acta</i> , 2009, <b>92</b> , 2086        |
| Schisfendilactone A  | H              | OH             | H              | H              | H              | <i>Schisandra sphenanthera</i> | <i>Arch. Pharmacol. Res.</i> , 2014, <b>37</b> , 168    |

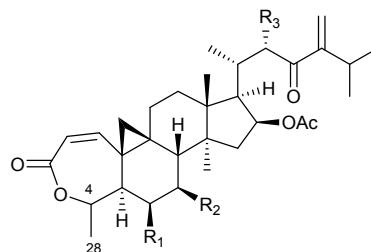

| Compound                       | R <sub>1</sub> | R <sub>2</sub> | R <sub>3</sub> | Δ <sup>4,28</sup> | Source                        | Reference                                      |
|--------------------------------|----------------|----------------|----------------|-------------------|-------------------------------|------------------------------------------------|
| Neomacrolactone                | H              | H              | OH             | -                 | <i>Neoboutonia macrocalyx</i> | <i>Phytochemistry</i> , 2014, <b>102</b> , 189 |
| 4-Methyleneneomacrolactone     | H              | H              | OH             | +                 | <i>Neoboutonia macrocalyx</i> | <i>Phytochemistry</i> , 2014, <b>102</b> , 189 |
| 6-Hydroxyneomacrolactone       | OH             | H              | OH             | -                 | <i>Neoboutonia macrocalyx</i> | <i>Phytochemistry</i> , 2014, <b>102</b> , 189 |
| 6-Hydroxyacetylneomacrolactone | OH             | H              | OAc            | -                 | <i>Neoboutonia macrocalyx</i> | <i>Phytochemistry</i> , 2014, <b>102</b> , 189 |
| Acetylneomacrolactone          | H              | H              | OAc            | -                 | <i>Neoboutonia macrocalyx</i> | <i>Phytochemistry</i> , 2014, <b>102</b> , 189 |
| 6,7-Epoxyacetylneomacrolactone |                | -O-            | OAc            | -                 | <i>Neoboutonia macrocalyx</i> | <i>Phytochemistry</i> , 2014, <b>102</b> , 189 |
| 6,7-Epoxyneomacrolactone       |                | -O-            | OH             | -                 | <i>Neoboutonia macrocalyx</i> | <i>Phytochemistry</i> , 2014, <b>102</b> , 189 |

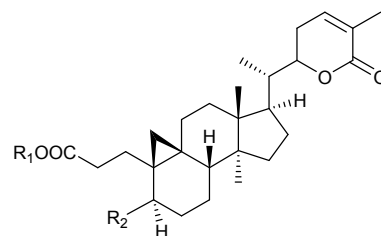

| Compound              | R <sub>1</sub> | R <sub>2</sub> | Source                                            | Reference                                          |
|-----------------------|----------------|----------------|---------------------------------------------------|----------------------------------------------------|
| Schinalactone C       | H              |                | <i>Schisandra sphenanthera</i>                    | <i>Org. Lett.</i> , 2010, <b>12</b> , 1208         |
| Propinic lactone A    | Me             |                | <i>Schisandra propinqua</i> var. <i>propinqua</i> | <i>Chin. J. Nat. Med.</i> , 2010, <b>8</b> , 1     |
| Sinocalyanchinensin D | H              |                | <i>Calycanthus chinensis</i>                      | <i>Bioorg. Med. Chem.</i> , 2010, <b>19</b> , 2790 |

|                       |    |                                                                                   |                              |                                                    |
|-----------------------|----|-----------------------------------------------------------------------------------|------------------------------|----------------------------------------------------|
| Sinocalyanchinensin E | Me |  | <i>Calycanthus chinensis</i> | <i>Bioorg. Med. Chem.</i> , 2010, <b>19</b> , 2790 |
|-----------------------|----|-----------------------------------------------------------------------------------|------------------------------|----------------------------------------------------|

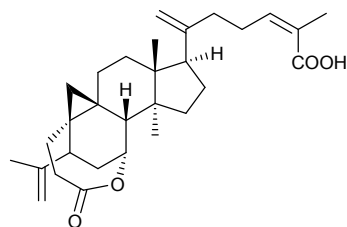

| Compound           | Source                      | Reference                                               |
|--------------------|-----------------------------|---------------------------------------------------------|
| Angustifica acid A | <i>Kadsura angustifolia</i> | <i>Bioorg. Med. Chem. Lett.</i> , 2011, <b>21</b> , 961 |

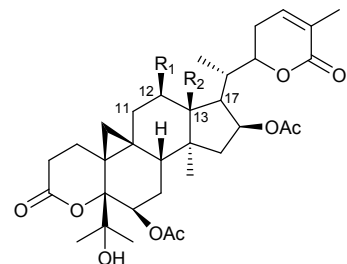

| Compound   | R <sub>1</sub> | R <sub>2</sub> | $\Delta$ | Source                  | Reference                                     |
|------------|----------------|----------------|----------|-------------------------|-----------------------------------------------|
| Ananosin D | H              | Me             | 11,12    | <i>Kadsura ananosma</i> | <i>Phytochemistry</i> , 2015, <b>109</b> , 36 |
| Ananosin C | Me             | H              | 13,17    | <i>Kadsura ananosma</i> | <i>Phytochemistry</i> , 2015, <b>109</b> , 36 |

**Table S2: 3,4-*seco*-Lanostane**

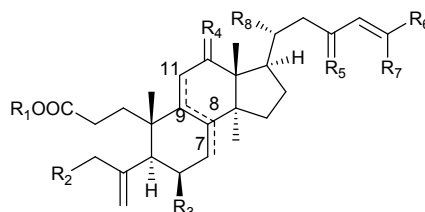

| Compound                | R <sub>1</sub> | R <sub>2</sub> | R <sub>3</sub> | R <sub>4</sub> | R <sub>5</sub> | R <sub>6</sub> | R <sub>7</sub> | R <sub>8</sub> | Δ     | Source                                                   | Reference                                                                                     |
|-------------------------|----------------|----------------|----------------|----------------|----------------|----------------|----------------|----------------|-------|----------------------------------------------------------|-----------------------------------------------------------------------------------------------|
| Secococcinic acid F     | H              | H              | H              | H,H            | H,H            | COOH           | Me             | Me             | 9(11) | <i>Kadsura coccinea</i>                                  | <i>J. Nat. Prod.</i> , 2008, <b>71</b> ,990                                                   |
| Schiglausin D           | H              | H              | OH             | H,H            | H,H            | Me             | COOH           | Me             | 9(11) | <i>Schisandra glaucescens</i>                            | <i>Planta Med.</i> , 2012, <b>78</b> , 472                                                    |
| Schiglausin E           | Me             | H              | H              | H,H            | H,H            | Me             | COOH           | Me             | 9(11) | <i>Schisandra glaucescens</i>                            | <i>Planta Med.</i> , 2012, <b>78</b> , 472                                                    |
| Schiglausin F           | Me             | OH             | H              | H,H            | α-OH,β-H       | Me             | COOH           | Me             | 9(11) | <i>Schisandra glaucescens</i>                            | <i>Planta Med.</i> , 2012, <b>78</b> , 472                                                    |
| Schiglausin G           | Me             | H              | H              | =O             | H,H            | Me             | COOH           | Me             | 9(11) | <i>Schisandra glaucescens</i>                            | <i>Planta Med.</i> , 2012, <b>78</b> , 472                                                    |
| Secococcinic acid F     | H              | H              | H              | H,H            | H,H            | Me             | Me             | Me             | 8,9   | <i>Kadsura coccinea</i>                                  | <i>Planta Med.</i> , 2012, <b>78</b> , 1661                                                   |
| Kadpolysperin J         | Me             | H              | H              | H,H            | H,H            | Me             | COOH           | Me             | 8,9   | <i>Kadsura polysperma</i>                                | <i>Tetrahedron</i> , 2012, <b>68</b> , 4820                                                   |
| Kadpolysperin K         | Me             | H              | H              | H,H            | H,H            | COOH           | Me             | Me             | 8,9   | <i>Kadsura polysperma</i>                                | <i>Tetrahedron</i> , 2012, <b>68</b> , 4820                                                   |
| Kadsuracoccininc acid B | H              | H              | H              | H,H            | H,H            | Me             | Me             | Me             | 9(11) | <i>Kadsura coccinea</i>                                  | <i>J. Nat. Prod.</i> , 2008, <b>71</b> ,739                                                   |
| Kadsuracoccininc acid C | H              | H              | H              | H,H            | H,H            | COOH           | Me             | Me             | 9(11) | <i>Kadsura coccinea</i>                                  | <i>J. Nat. Prod.</i> , 2008, <b>71</b> ,739                                                   |
| Secococcininc acid B    | H              | H              | H              | H,H            | H,H            | Me             | Me             | Me             | 7,8   | <i>Kadsura coccinea</i>                                  | <i>J. Nat. Prod.</i> , 2008, <b>71</b> ,990                                                   |
| Secococcininc acid F    | H              | H              | H              | H,H            | H,H            | Me             | Me             | Me             | 7,8   | <i>Kadsura coccinea</i>                                  | <i>Planta Med.</i> , 2012, <b>78</b> , 1661                                                   |
| Kadpolysperin I         | H              | H              | H              | H,H            | H,H            | COOH           | Me             | Me             | 7,8   | <i>Kadsura polysperma</i><br><i>Abies koreana</i>        | <i>Tetrahedron</i> , 2012, <b>68</b> , 4820<br><i>Phytochemistry</i> , 2004, <b>65</b> , 2545 |
| Kadpolysperin K         | H              | H              | H              | H,H            | H,H            | Me             | COOH           | Me             | 8,9   | <i>Kadsura polysperma</i><br><i>Schisandra propinqua</i> | <i>Tetrahedron</i> , 2012, <b>68</b> , 4820<br><i>Can. J. Chem.</i> 1988, <b>88</b> , 414     |
| Leplaeric acid A        | H              | H              | H              | H,H            | H,H            | Me             | Me             | COOH           | 7,8   | <i>Leplaea mayombensis</i>                               | <i>J. Nat. Prod.</i> , 2017, <b>80</b> ,2644                                                  |
| Leplaeric acid B        | Me             | H              | H              | H,H            | H,H            | Me             | Me             | COOH           | 7,8   | <i>Leplaea mayombensis</i>                               | <i>J. Nat. Prod.</i> , 2017, <b>80</b> ,2644                                                  |



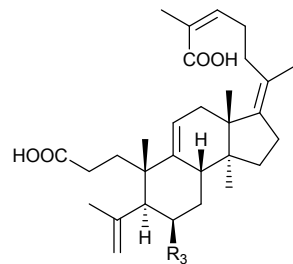

| Compound               |  | Source                  | Reference                                    |
|------------------------|--|-------------------------|----------------------------------------------|
| Kadsuracoccinic acid A |  | <i>Kadsura coccinea</i> | <i>J. Nat. Prod.</i> , 2008, <b>71</b> , 739 |

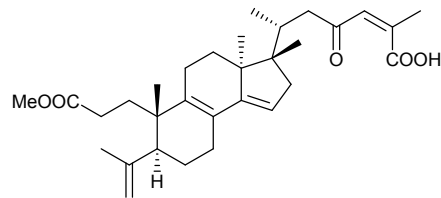

| Compound    |  | Source                | Reference                                      |
|-------------|--|-----------------------|------------------------------------------------|
| Abiferine D |  | <i>Abies fargesii</i> | <i>Phytochemistry</i> , 2016, <b>130</b> , 301 |

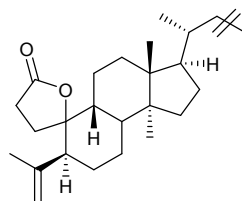

| Compound      | R                                                                                  | Source                     | Reference                                      |
|---------------|------------------------------------------------------------------------------------|----------------------------|------------------------------------------------|
| Sablacaurin A |  | <i>Sabal causarium</i>     | <i>Phytochemistry</i> , 2004, <b>65</b> , 1153 |
| Sablacaurin B |   | <i>Sabal blackburniana</i> | <i>Phytochemistry</i> , 2004, <b>65</b> , 1153 |

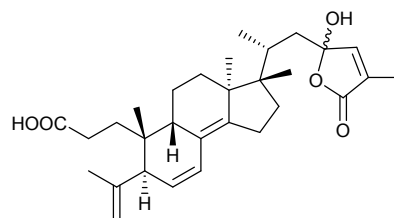

| Compound       | Source                     | Reference                                        |
|----------------|----------------------------|--------------------------------------------------|
| Abiesanolide E | <i>Abies sachalinensis</i> | <i>Chem. Pharm. Bull</i> , 2008, <b>56</b> , 554 |

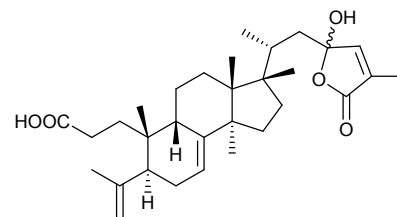

| Compound       |  | Source                     | Reference                                         |
|----------------|--|----------------------------|---------------------------------------------------|
| Abiesanolide F |  | <i>Abies sachalinensis</i> | <i>Chem. Pharm. Bull.</i> , 2008, <b>56</b> , 554 |

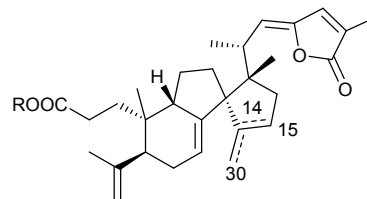

| Compound   | R  | $\Delta$ | Source                     | Reference                                          |
|------------|----|----------|----------------------------|----------------------------------------------------|
| Abiesole A | H  | 14(30)   | <i>Abies sachalinensis</i> | <i>Chem. Pharm. Bull.</i> , 2000, <b>48</b> , 1917 |
| Abiesole B | Me | 14(30)   | <i>Abies sachalinensis</i> | <i>Chem. Pharm. Bull.</i> , 2000, <b>48</b> , 1917 |
| Abiesole C | H  | 14,15    | <i>Abies sachalinensis</i> | <i>Chem. Pharm. Bull.</i> , 2000, <b>48</b> , 1917 |
| Abiesole E | Me | 14,15    | <i>Abies sachalinensis</i> | <i>Chem. Pharm. Bull.</i> , 2000, <b>48</b> , 1917 |

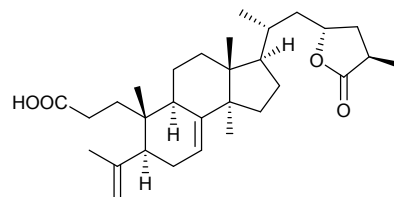

| Compound           |  | Source                 | Reference                                     |
|--------------------|--|------------------------|-----------------------------------------------|
| Abiesolidic acid A |  | <i>Abies faxoniana</i> | <i>Phytchemistry</i> , 2015, <b>116</b> , 221 |

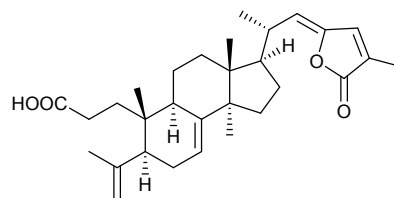

| Compound   |  | Source                  | Reference                                    |
|------------|--|-------------------------|----------------------------------------------|
| halophylla |  | <i>Abies halophylla</i> | <i>Phytchemistry</i> , 2012, <b>74</b> , 178 |

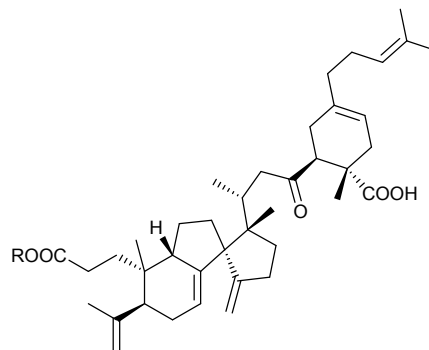

| Compound      | R  | Source                | Reference                                  |
|---------------|----|-----------------------|--------------------------------------------|
| Abibalsamin A | H  | <i>Abies balsamea</i> | <i>Org. Lett.</i> , 2012, <b>14</b> , 1504 |
| Abibalsamin B | Me | <i>Abies balsamea</i> | <i>Org. Lett.</i> , 2012, <b>14</b> , 1504 |

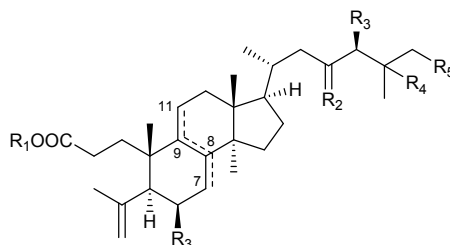

| Compound             | R <sub>1</sub> | R <sub>2a,b</sub> | R <sub>3</sub> | R <sub>4</sub> | R <sub>5</sub> | Δ     | Source                  | Reference                                    |
|----------------------|----------------|-------------------|----------------|----------------|----------------|-------|-------------------------|----------------------------------------------|
| Secococcinic acid A  | H              | =O                | H              | H              | H              | 7,8   | <i>Kadsura coccinea</i> | <i>J. Nat. Prod.</i> , 2008, <b>71</b> , 990 |
| Secococcinic acid C  | H              | =O                | OH             | OH             | H              | 7,8   | <i>Kadsura coccinea</i> | <i>J. Nat. Prod.</i> , 2008, <b>71</b> , 990 |
| Secococcinic acid I  | H              | H,H               | OH             | OH             | H              | 7,8   | <i>Kadsura coccinea</i> | <i>Planta Med.</i> , 2012, <b>78</b> , 1661  |
| Secococcininc acid D | H              | Δ(E)              |                | OH             | H              | 7,8   | <i>Kadsura coccinea</i> | <i>J. Nat. Prod.</i> , 2008, <b>71</b> , 990 |
| Secococcininc acid E | H              | H,H               | OH             | Δ              |                | 7,8   | <i>Kadsura coccinea</i> | <i>J. Nat. Prod.</i> , 2008, <b>71</b> , 990 |
| Secococcinic acid K  | Me             | =O                | H              | H              | H              | 9(11) | <i>Kadsura coccinea</i> | <i>Planta Med.</i> , 2012, <b>78</b> , 1661  |

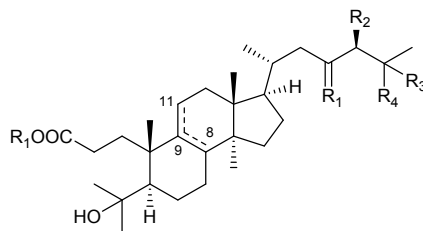

| Compound            | R <sub>1</sub> | R <sub>2</sub> | R <sub>3</sub> | R <sub>4</sub> | Δ     | Source                  | Reference                                   |
|---------------------|----------------|----------------|----------------|----------------|-------|-------------------------|---------------------------------------------|
| Secococcinic acid J | =O             | H              | H              | H              | 9(11) | <i>Kadsura coccinea</i> | <i>Planta Med.</i> , 2012, <b>78</b> , 1661 |
| Kadnanosic acid A   | H,H            | Δ (Z)          |                | COOH           | 8,9   | <i>Kadsura ananosma</i> | <i>Tetrahedron</i> , 2010, <b>66</b> , 8880 |

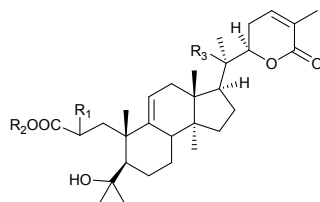

| Compound         | R <sub>1</sub> | R <sub>2</sub> | R <sub>3</sub> | Source                         | Reference                                  |
|------------------|----------------|----------------|----------------|--------------------------------|--------------------------------------------|
| Schisphentin A   | H              | H              | H              | <i>Schisandra sphenanthera</i> | <i>Fitoterapia</i> , 2017, <b>116</b> , 10 |
| Schisphentin B   | H              | H              | OH             | <i>Schisandra sphenanthera</i> | <i>Fitoterapia</i> , 2017, <b>116</b> , 10 |
| Schiglausins C   | OH             | Me             | H              | <i>Schisandra sphenanthera</i> | <i>Fitoterapia</i> , 2017, <b>116</b> , 10 |
| Schisanlactone H | H              | Me             | H              | <i>Schisandra sphenanthera</i> | <i>Fitoterapia</i> , 2017, <b>116</b> , 10 |

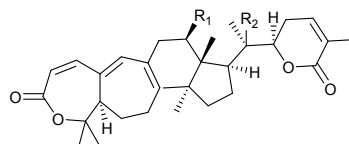

| Compound         | R <sub>1</sub> | R <sub>2</sub> | Source                         | Reference                                  |
|------------------|----------------|----------------|--------------------------------|--------------------------------------------|
| Schisphentin C   | OH             | H              | <i>Schisandra sphenanthera</i> | <i>Fitoterapia</i> , 2017, <b>116</b> , 10 |
| Schisanlactone H | H              | OH             | <i>Schisandra sphenanthera</i> | <i>Fitoterapia</i> , 2017, <b>116</b> , 10 |

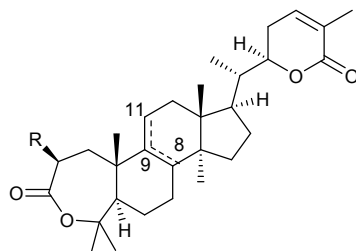

| Compound         | R  | $\Delta$ | Source                        | Reference                                    |
|------------------|----|----------|-------------------------------|----------------------------------------------|
| Kadnanolactone C | H  | 8,9      | <i>Kadsura anamosma</i>       | <i>Tetrahedron.</i> , 2010, <b>66</b> , 8880 |
| Schiglausin A    | H  | 9(11)    | <i>Schisandra glaucescens</i> | <i>Planta Med.</i> , 2012, <b>78</b> , 472   |
| Schiglausin B    | OH | 9(11)    | <i>Schisandra glaucescens</i> | <i>Planta Med.</i> , 2012, <b>78</b> , 472   |

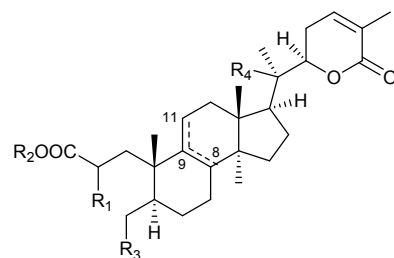

| Compound          | R <sub>1</sub> | R <sub>2</sub> | R <sub>3</sub>         | R <sub>4</sub> | $\Delta$ | Source                         | Reference                                            |
|-------------------|----------------|----------------|------------------------|----------------|----------|--------------------------------|------------------------------------------------------|
| Schigalusin C     | OH             | Me             | -C(Me) <sub>2</sub> OH | H              | 9(11)    | <i>Schisandra glaucescens</i>  | <i>Planta Med.</i> , 2012, <b>78</b> , 472           |
| Schisanlactone H  | H              | Me             | -C(Me) <sub>2</sub> OH | H              | 9(11)    | <i>Schisandra sphenanthera</i> | <i>Asian Nat. Prod. Res.</i> , 2009, <b>11</b> , 861 |
| Cadcoccolactone R | H              | H              | -C(Me) <sub>2</sub> OH | H              | 8,9      | <i>Kadsura coccinea</i>        | <i>Tetrahedron</i> , 2008, <b>64</b> , 11673         |
| Kadnanolactone D  | H              | Me             | -C(Me) <sub>2</sub> OH | H              | 8,9      | <i>Kadsura ananosma</i>        | <i>Tetrahedron</i> , 2010, <b>66</b> , 8880          |
| Schisanlactone G  | H              | Me             | -C(Me)=CH <sub>2</sub> | H              | 9(11)    | <i>Schisandra sphenanthera</i> | <i>Chin. Chem.Lett.</i> 2009, <b>20</b> , 601        |
| Schisphentin A    | H              | H              | -C(Me) <sub>2</sub> OH | H              | 9(11)    | <i>Schisandra sphenanthera</i> | <i>Fitoterapia</i> , 2017, <b>116</b> , 10           |

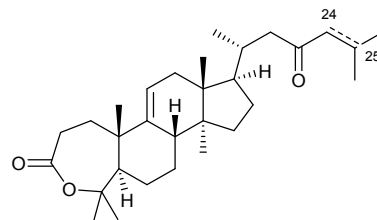

| Compound         | $\Delta^{24,25}$ | Source                  | Reference                                        |
|------------------|------------------|-------------------------|--------------------------------------------------|
| Coccinilactone B | +                | <i>Kadsura coccinea</i> | <i>Helv. Chim. Acta</i> , 2009, <b>92</b> , 1413 |
| Coccinilatone A  | -                | <i>Kadsura coccinea</i> | <i>J. Nat. Prod.</i> , 2008, <b>71</b> , 990     |

**Table S3: 3,4-seco-Dammaranes**

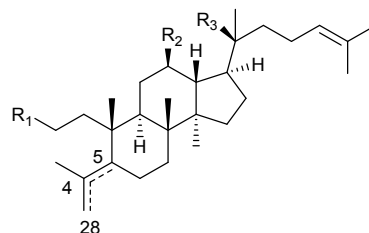

| Compound                              | R <sub>1</sub>      | R <sub>2</sub> | R <sub>3</sub> | $\Delta$ | Source                                                                                    | Reference                                                                                                                                                                          |
|---------------------------------------|---------------------|----------------|----------------|----------|-------------------------------------------------------------------------------------------|------------------------------------------------------------------------------------------------------------------------------------------------------------------------------------|
| Dammarenolic acid                     | COOH                | H              | OH             | 4(28)    | Dammar resin<br><i>Alaia ignea</i><br><i>Quercus robur</i><br><i>Cabralea eichleriana</i> | <i>Proc. Chem. Soc.</i> , 1959, 306<br><i>Phytomedicine</i> , 2010, <b>17</b> , 540<br><i>Phytochemistry</i> , 1973, <b>12</b> , 946<br><i>Tetrahedron</i> , 1975, <b>31</b> , 333 |
| Cyclocariol G                         | COOMe               | OH             | H              | 4(28)    | <i>Cyclocarya paliurus</i>                                                                | <i>Phytochemistry</i> 2018, <b>145</b> , 85                                                                                                                                        |
| 3-acetoxy-3,4-seco-dammara-4,21-diene | CH <sub>2</sub> OAc | H              | H              | 4,5      | <i>Abrotanella forsterioides</i>                                                          | <i>Phytochemistry</i> , 1983, <b>22</b> , 2085                                                                                                                                     |



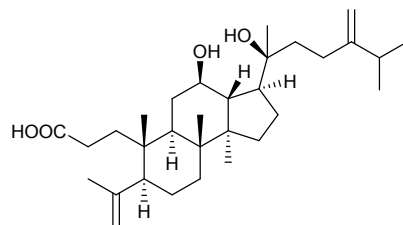

| Compound      | R | Source                   | Reference                                             |
|---------------|---|--------------------------|-------------------------------------------------------|
| Alnustic acid | H | <i>Alnus sieboldiana</i> | <i>Bull. Chem. Soc. Jpn.</i> , 1979, <b>52</b> , 1698 |

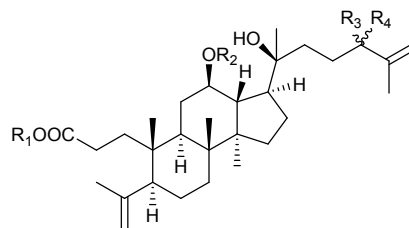

| Compound      | R <sub>1</sub> | R <sub>2</sub>                 | R <sub>3</sub> | R <sub>4</sub> | Source                     | Reference                                     |
|---------------|----------------|--------------------------------|----------------|----------------|----------------------------|-----------------------------------------------|
| Cyclocariol A | Me             | OH                             | OH             | H              | <i>Cyclocaria paliurus</i> | <i>Phytochemistry</i> , 2018, <b>145</b> , 85 |
| Cyclocariol B | Me             | OH                             | H              | OH             | <i>Cyclocaria paliurus</i> | <i>Phytochemistry</i> , 2018, <b>145</b> , 85 |
| Cyclocariol C | H              | OH                             | OH             | H              | <i>Cyclocaria paliurus</i> | <i>Phytochemistry</i> , 2018, <b>145</b> , 85 |
| Cyclocariol D | H              | OH                             | H              | OH             | <i>Cyclocaria paliurus</i> | <i>Phytochemistry</i> , 2018, <b>145</b> , 85 |
| Cyclocariol H | Me             | <i>L</i> - $\alpha$ -arabinose | OH             | H              | <i>Cyclocaria paliurus</i> | <i>Phytochemistry</i> , 2018, <b>145</b> , 85 |

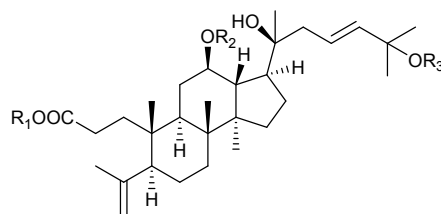

| Compound         | R <sub>1</sub> | R <sub>2</sub>         | R <sub>3</sub> | Source                     | Reference                                     |
|------------------|----------------|------------------------|----------------|----------------------------|-----------------------------------------------|
| Cyclocariol E    | Me             | H                      | H              | <i>Cyclocaria paliurus</i> | <i>Phytochemistry</i> , 2018, <b>145</b> , 85 |
| Cyclocariol F    | Me             | H                      | Me             | <i>Cyclocaria paliurus</i> | <i>Phytochemistry</i> , 2018, <b>145</b> , 85 |
| Cyclocarioside D | H              | <i>D</i> -β-quinoviose | Me             | <i>Cyclocaria paliurus</i> | <i>Planta Med.</i> , 2012, <b>78</b> , 290    |
| Cyclocarioside E | Et             | <i>D</i> -β-quinoviose | Me             | <i>Cyclocaria paliurus</i> | <i>Planta Med.</i> , 2012, <b>78</b> , 290    |
| Cyclocarioside F | H              | <i>L</i> -α-arabinose  | Me             | <i>Cyclocaria paliurus</i> | <i>Planta Med.</i> , 2012, <b>78</b> , 290    |
| Cyclocarioside G | Et             | <i>L</i> -α-arabinose  | Me             | <i>Cyclocaria paliurus</i> | <i>Planta Med.</i> , 2012, <b>78</b> , 290    |

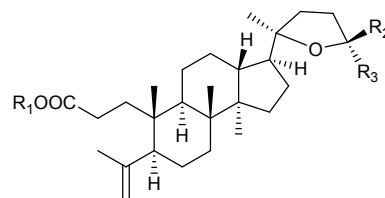

| Compound           | R <sub>1</sub> | R <sub>2</sub>           | R <sub>3</sub>       | Source                      | Reference                                             |
|--------------------|----------------|--------------------------|----------------------|-----------------------------|-------------------------------------------------------|
| Shoreic acid       | H              | -CMe <sub>2</sub> OH     | H                    | <i>Shorea spp. vv.</i>      | <i>Proc. Chem. Soc.</i> , 1959, 306                   |
| Methyl shoreate    | Me             | -CMe <sub>2</sub> OH     | H                    | <i>Cabralea eichleriana</i> | <i>Tetrahedron</i> , 1975, <b>31</b> , 333            |
| Eichlerianic acid  | H              | H                        | -CMe <sub>2</sub> OH | <i>Cabralea eichleriana</i> | <i>Tetrahedron</i> , 1975, <b>31</b> , 333            |
| Eichlereia lactone | H              | =O                       |                      | <i>Cabralea eichleriana</i> | <i>Tetrahedron</i> , 1975, <b>31</b> , 333            |
| Alnuseric acid     | H              | Me                       | -CHMe <sub>2</sub>   | <i>Alnus serratuloides</i>  | <i>Bull. Chem. Soc. Jpn.</i> , 1979, <b>52</b> , 1698 |
| Aglinin A          | H              | OH, -CMe <sub>2</sub> OH |                      | <i>Aglaia lawii</i>         | <i>Phytochemistry</i> , 1999, <b>51</b> , 1031        |

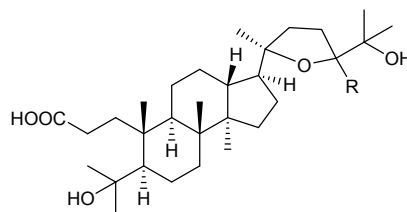

| Compound   | R  | Source                  | Reference                                      |
|------------|----|-------------------------|------------------------------------------------|
| Aglinin B  | OH | <i>Aglaia lawii</i>     | <i>Phytochemistry</i> , 1999, <b>51</b> , 1031 |
| Foveolin A | H  | <i>Aglaia foveolata</i> | <i>Phytochemistry</i> , 1999, <b>51</b> , 1031 |

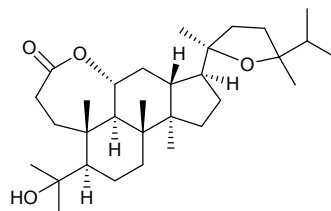

| Compound | Source                     | Reference                                             |
|----------|----------------------------|-------------------------------------------------------|
| Alnuside | <i>Alnus serratuloides</i> | <i>Bull. Chem. Soc. Jpn.</i> , 1979, <b>52</b> , 1698 |

**Table S4: 3,4-*seco*-Orysatinol**

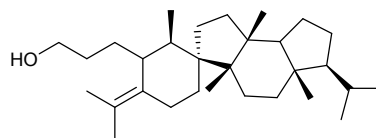

| Compound     | Source              | Reference                                    |
|--------------|---------------------|----------------------------------------------|
| Oryspaspirol | <i>Oryza sativa</i> | <i>New Phytol.</i> , 2018, <b>218</b> , 1076 |

**Table S5: 2,3-*seco*-Cycloartenol**

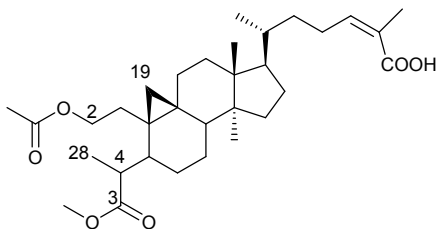

| Compound              |  | Source                       | Reference                                          |
|-----------------------|--|------------------------------|----------------------------------------------------|
| Sinocalyanchinensin F |  | <i>Calycanthus chinensis</i> | <i>Bioorg. Med. Chem.</i> , 2011, <b>19</b> , 2790 |

**Table S6: 2,3-seco-Oleananes**

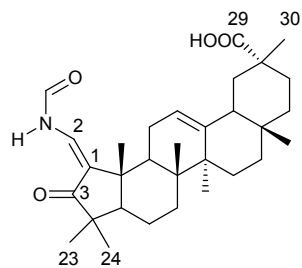

| Compound         |  | Source                      | Reference                                  |
|------------------|--|-----------------------------|--------------------------------------------|
| Dysoxyhainanin A |  | <i>Dysoxylum hainanense</i> | <i>Org. Lett.</i> , 2008, <b>10</b> , 4327 |

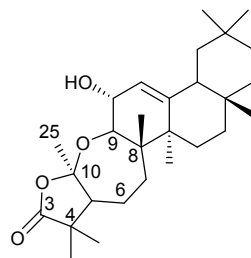

| Compound         |  | Source                      | Reference                                  |
|------------------|--|-----------------------------|--------------------------------------------|
| Dysoxyhainanin B |  | <i>Dysoxylum hainanense</i> | <i>Org. Lett.</i> , 2008, <b>10</b> , 4327 |

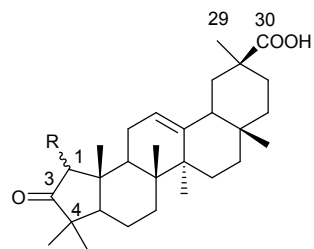

| Compound            | R            | Source                      | Reference                              |
|---------------------|--------------|-----------------------------|----------------------------------------|
| Dysoxyhainic acid B | $\alpha$ -OH | <i>Dysoxylum hainanense</i> | <i>Eur. J. Org. Chem.</i> , 2009, 4818 |
| Dysoxyhainic acid C | $\beta$ -OH  | <i>Dysoxylum hainanense</i> | <i>Eur. J. Org. Chem.</i> , 2009, 4818 |

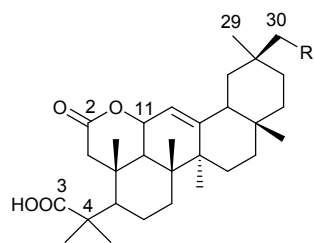

| Compound            | R   | Source                      | Reference                              |
|---------------------|-----|-----------------------------|----------------------------------------|
| Dysoxyhainic acid D | H   | <i>Dysoxylum hainanense</i> | <i>Eur. J. Org. Chem.</i> , 2009, 4818 |
| Dysoxyhainic acid E | OAc | <i>Dysoxylum hainanense</i> | <i>Eur. J. Org. Chem.</i> , 2009, 4818 |

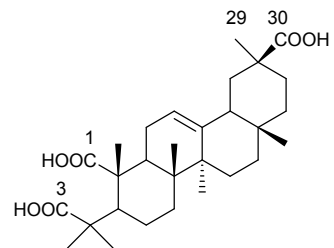

| Compound            | Source                      | Reference                                         |
|---------------------|-----------------------------|---------------------------------------------------|
| Dysoxyhainic acid F | <i>Dysoxylum hainanense</i> | <i>Bioorg. Med. Chem.</i> , 2011, <b>21</b> , 125 |

**Table S7: 2,3-*seco*-Friedelin**

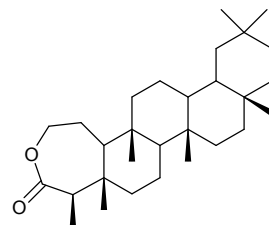

| Compound            | Source                     | Reference                                                 |
|---------------------|----------------------------|-----------------------------------------------------------|
| Lithocarpic lactone | <i>Lithocarpus irwinii</i> | <i>J. Chem. Soc. Perkin Trans.</i> , 1975, <b>1</b> , 617 |

**Table S8: 2,3-*seco*-Tirucallanes**

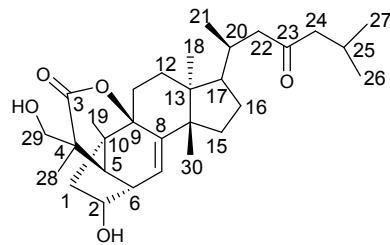

| Compound          | Source                         | Reference                                      |
|-------------------|--------------------------------|------------------------------------------------|
| Aphanamgrandiol A | <i>Aphanamixis grandifolia</i> | <i>Fitoterapia</i> , 2013, <b>86</b> , 217-221 |

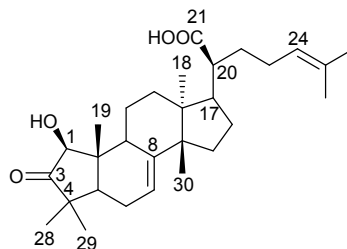

| Compound            | Source                      | Reference                              |
|---------------------|-----------------------------|----------------------------------------|
| Dysoxyhainic acid A | <i>Dysoxylum hainanense</i> | <i>Eur. J. Org. Chem.</i> , 2009, 4818 |

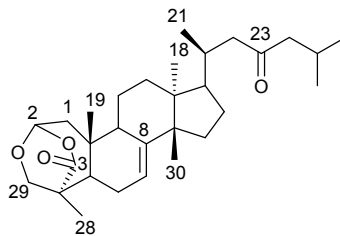

| Compound | Source | Reference |
|----------|--------|-----------|
|          |        |           |

|                  |                                |                                                                                                        |
|------------------|--------------------------------|--------------------------------------------------------------------------------------------------------|
| Aphanamgrandin A | <i>Aphanamixis grandifolia</i> | <i>Phytochemistry</i> , 2012, <b>80</b> , 148<br><i>Nat. Prod. Bioprospect.</i> , 2012, <b>2</b> , 222 |
|------------------|--------------------------------|--------------------------------------------------------------------------------------------------------|

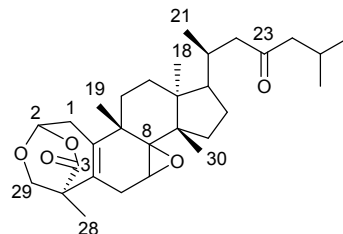

| Compound         | Source                         | Reference                                     |
|------------------|--------------------------------|-----------------------------------------------|
| Aphanamgrandin B | <i>Aphanamixis grandifolia</i> | <i>Phytochemistry</i> , 2012, <b>80</b> , 148 |

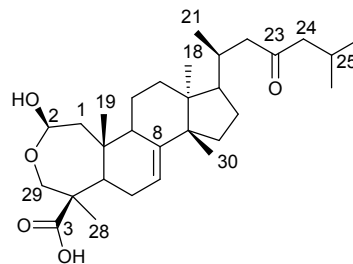

| Compound         | $\Delta$ | Source                         | Reference                                     |
|------------------|----------|--------------------------------|-----------------------------------------------|
| Aphanamgrandin C | -        | <i>Aphanamixis grandifolia</i> | <i>Phytochemistry</i> , 2012, <b>80</b> , 148 |
| Aphanamgrandin D | 24(25)   | <i>Aphanamixis grandifolia</i> | <i>Phytochemistry</i> , 2012, <b>80</b> , 148 |



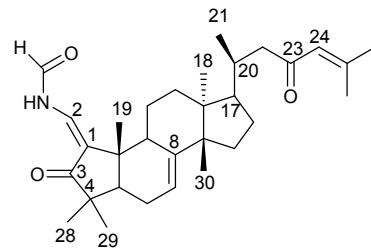

| Compound         | Source                         | Reference                                     |
|------------------|--------------------------------|-----------------------------------------------|
| Aphanamgrandin E | <i>Aphanamixis grandifolia</i> | <i>Phytochemistry</i> , 2012, <b>80</b> , 148 |

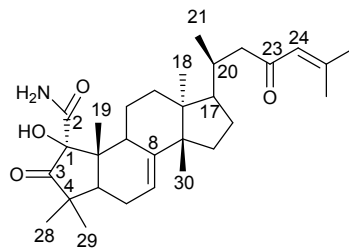

| Compound         | Source                         | Reference                                         |
|------------------|--------------------------------|---------------------------------------------------|
| Aphanamgrandin F | <i>Aphanamixis grandifolia</i> | <i>Phytochemistry</i> , 2012, <b>80</b> , 148-155 |

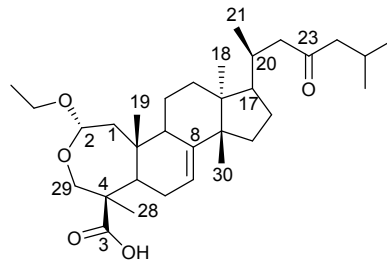

| Compound | Source | Reference |
|----------|--------|-----------|
|          |        |           |

|                                     |                                |                                                      |
|-------------------------------------|--------------------------------|------------------------------------------------------|
|                                     | Source                         |                                                      |
| 2 $\alpha$ -ethoxy-aphanamgrandin C | <i>Aphanamixis grandifolia</i> | <i>Nat. Prod. Bioprospect.</i> ,2012, <b>2</b> , 222 |

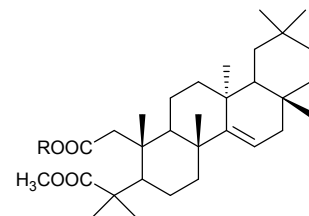

| Compound                                                      | R               | Source                       | Reference                                    |
|---------------------------------------------------------------|-----------------|------------------------------|----------------------------------------------|
| 2,3-seco-taraxer-14-ene-2,3,28-trioic acid 3-methyl ester     | H               | <i>Elateriospermum tapos</i> | <i>J. Nat. Prod.</i> , <b>2008</b> , 71, 292 |
| 2,3-seco-taraxer-14-ene-2,3,28-trioic acid 2,3-dimethyl ester | CH <sub>3</sub> | <i>Elateriospermum tapos</i> | <i>J. Nat. Prod.</i> , <b>2008</b> , 71, 292 |

**Table S9: 3,4;9,10-*seco*-triterpenoids**

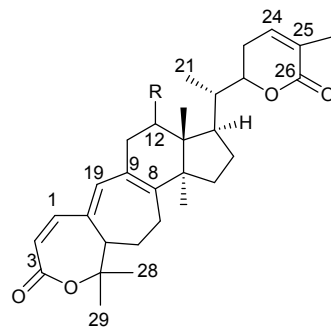

| Compound         | R  | Source                         | Reference                                         |
|------------------|----|--------------------------------|---------------------------------------------------|
| Schisanlactone A | H  | <i>Schisandra spp</i>          | <i>Tetrahedron Lett.</i> , 1983, <b>24</b> , 2351 |
| Schisphenthin C  | OH | <i>Schisandra sphenanthera</i> | <i>Fitoterapia</i> , 2017, <b>116</b> , 10        |

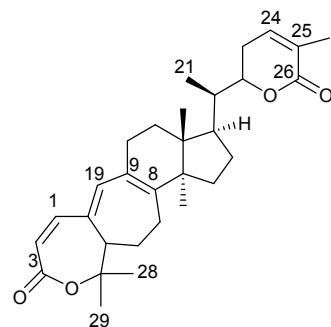

| Compound         | Source                | Reference                                         |
|------------------|-----------------------|---------------------------------------------------|
| Schisanlactone B | <i>Schisandra spp</i> | <i>Tetrahedron Lett.</i> , 1983, <b>24</b> , 2355 |

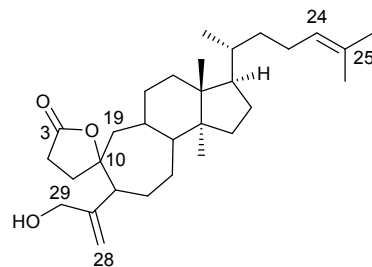

| Compound       | Source                   | Reference                                      |
|----------------|--------------------------|------------------------------------------------|
| Gardheptactone | <i>Gardenia urvillei</i> | <i>Phytochemistry</i> , 2016, <b>122</b> , 193 |

**Table S10: 3,4;9,10;14,15;15,17-seco-Cycloartane**

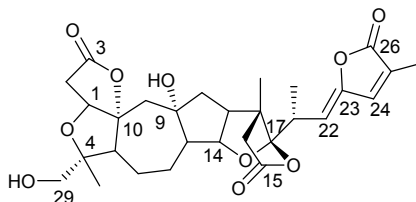

| Compound              | Source                       | Reference                                  |
|-----------------------|------------------------------|--------------------------------------------|
| Schilancitrilactone A | <i>Schisandra lancifolia</i> | <i>Org. Lett.</i> , 2012, <b>14</b> , 1286 |

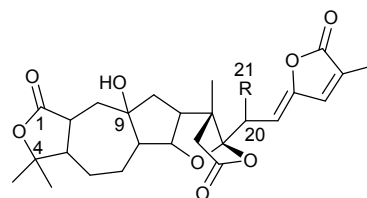

| Compound              | R <sub>1</sub>  | R <sub>2</sub> | Source                       | Reference                                  |
|-----------------------|-----------------|----------------|------------------------------|--------------------------------------------|
| Schilancitrilactone B | <i>alfa</i> -Me |                | <i>Schisandra lancifolia</i> | <i>Org. Lett.</i> , 2012, <b>14</b> , 1286 |
| Schilancitrilactone C | <i>beta</i> Me  |                | <i>Schisandra lancifolia</i> | <i>Org. Lett.</i> , 2012, <b>14</b> , 1286 |

**Table S11: Poly-*seco*-triterpenoid**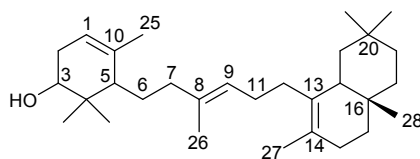

| Compound    | Source                   | Reference                                    |
|-------------|--------------------------|----------------------------------------------|
| Camelliol A | <i>Camellia sasanqua</i> | <i>J. Nat. Prod.</i> , 1999, <b>62</b> , 265 |

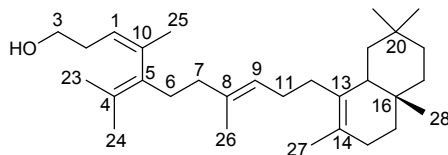

| Compound    | Source                   | Reference                                    |
|-------------|--------------------------|----------------------------------------------|
| Camelliol B | <i>Camellia sasanqua</i> | <i>J. Nat. Prod.</i> , 1999, <b>62</b> , 265 |

**Table S12: 13,17-*seco*-Dammarane**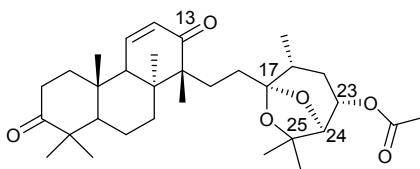

| Compound    | Source                  | Reference                                  |
|-------------|-------------------------|--------------------------------------------|
| Alismanin C | <i>Alisma orientale</i> | <i>Org. Lett.</i> , 2017, <b>19</b> , 5645 |

**Table S13: 8,14-Bond-missing Triterpenoids**

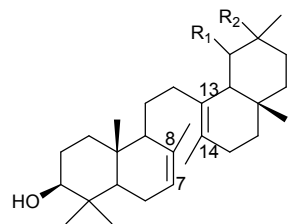

| Compound      | R <sub>1</sub> | R <sub>2</sub> | Source                                 | Reference                                               |
|---------------|----------------|----------------|----------------------------------------|---------------------------------------------------------|
| β-seco-amiryn | H              | Me             | <i>Arabidopsis thaliana (in vitro)</i> | <i>J. Am. Chem. Soc.</i> , 2007, <b>129</b> , 1450-1455 |
| α-seco-amiryn | Me             | H              | <i>Arabidopsis thaliana (in vitro)</i> | <i>J. Am. Chem. Soc.</i> , 2007, <b>129</b> , 1450-1455 |

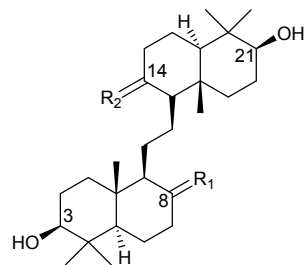

| Compound   | R <sub>1</sub>  | R <sub>2</sub>  | Source                     | Reference                                         |
|------------|-----------------|-----------------|----------------------------|---------------------------------------------------|
| α-Onocerin | CH <sub>2</sub> | CH <sub>2</sub> | <i>Ononis spinosa</i>      | <i>J. Chem. Soc.</i> , 1955, 2639                 |
| Lyclavatol | O               | O               | <i>Lycopodium clavatum</i> | <i>Chem. Pharm. Bull.</i> , 1962, <b>10</b> , 637 |

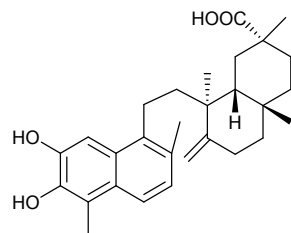

| Compound                                                                                       | Source                       | Reference                                     |
|------------------------------------------------------------------------------------------------|------------------------------|-----------------------------------------------|
| 25(9->8)abeo-24-nor-8,14-seco-friedelan-2,3-dihydroxy-1,3,5(10),6,8,14(27)-hexa-en-29-oic acid | <i>Celastrus orbiculatus</i> | <i>Phytochemistry</i> , 2012, <b>75</b> , 159 |

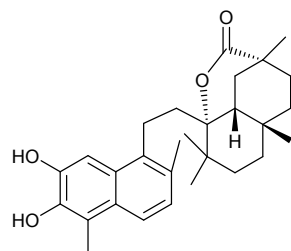

| Compound                                                                                            | Source                       | Reference                                     |
|-----------------------------------------------------------------------------------------------------|------------------------------|-----------------------------------------------|
| 25(9->8),26(13->14)abeo-24-nor-8,14-seco-friedelan-2,3-dihydroxy-1,3,5(10),6,8-pentaen-29(13)-olide | <i>Celastrus orbiculatus</i> | <i>Phytochemistry</i> , 2012, <b>75</b> , 159 |

**Table S14: 8,14;21,22-Bond-missing triterpenoids**

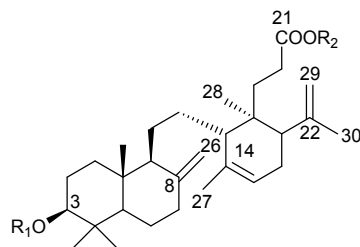

| Compound       | R <sub>1</sub> | R <sub>2</sub> | Source                    | Reference                                     |
|----------------|----------------|----------------|---------------------------|-----------------------------------------------|
| Lansiolic acid | H              | H              | <i>Lansium domesticum</i> | <i>J. Org. Chem.</i> , 1983, <b>48</b> , 4462 |

|              |                                  |    |                           |                                                         |
|--------------|----------------------------------|----|---------------------------|---------------------------------------------------------|
| Lansioside A | <i>N</i> -acetyl-B-D-glucosamine | H  | <i>Lansium domesticum</i> | <i>J. Org. Chem.</i> , 1983, <b>48</b> , 4462           |
| Lansioside B | D- $\beta$ -glucose              | H  | <i>Lansium domesticum</i> | <i>J. Org. Chem.</i> , 1983, <b>48</b> , 4462           |
| Lansioside C | D- $\beta$ -xylose               | H  | <i>Lansium domesticum</i> | <i>J. Org. Chem.</i> , 1983, <b>48</b> , 4462           |
| Lansioside D | D- $\beta$ -xylose               | Me | <i>Lansium domesticum</i> | <i>J. Pharmacogn. Phytochem.</i> , 2015, <b>3</b> , 140 |

**Table S15: 8,14;13,18-*seco*-Triterpenoids**

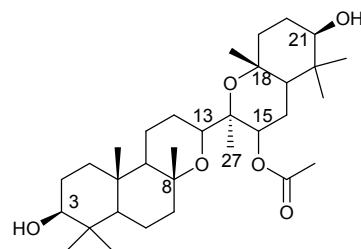

| Compound       | Source                     | Reference                                  |
|----------------|----------------------------|--------------------------------------------|
| Phyteumoside A | <i>Phyteuma orbiculare</i> | <i>Org. Lett.</i> , 2011, <b>13</b> , 1354 |

**Table S16: 3,4;8,14;21,22-Bond-missing triterpenoids**

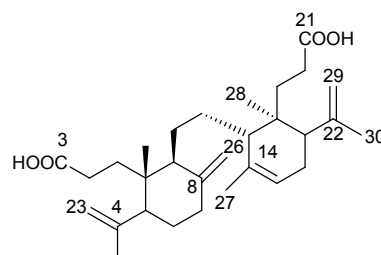

| Compound    | Source                    | Reference                                        |
|-------------|---------------------------|--------------------------------------------------|
| Lansic acid | <i>Lansium domesticum</i> | <i>Tetrahedron Lett.</i> , 1967, <b>8</b> , 3571 |





**Table S17: 16,17-seco-Dammaranes**

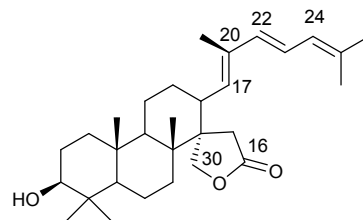

| Compound       | Source                 | Reference                                      |
|----------------|------------------------|------------------------------------------------|
| Ebelin lactone | <i>Zizyphus jujuba</i> | <i>Phytochemistry</i> , 1974, <b>13</b> , 2829 |

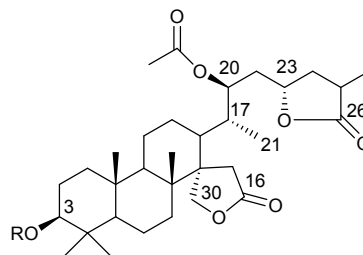

| Compound            | R                                                | $\Delta$ | Source                | Reference                                          |
|---------------------|--------------------------------------------------|----------|-----------------------|----------------------------------------------------|
| Hovenidulcioside A1 | L- $\alpha$ -rhamnose-(1->2)-D- $\beta$ -glucose | 24(25)   | <i>Hovenia dulcis</i> | <i>Chem. Pharm. Bull.</i> , 1996, <b>44</b> , 1736 |
| Hovenidulcioside A2 | D- $\beta$ -glucosyl                             | 24(25)   | <i>Hovenia dulcis</i> | <i>Chem. Pharm. Bull.</i> , 1996, <b>44</b> , 1736 |
| Hovenidulcioside B1 | L- $\alpha$ -rhamnose-(1->2)-D- $\beta$ -glucose | -        | <i>Hovenia dulcis</i> | <i>Chem. Pharm. Bull.</i> , 1996, <b>44</b> , 1736 |
| Hovenidulcioside B2 | D- $\beta$ -glucose                              | -        | <i>Hovenia dulcis</i> | <i>Chem. Pharm. Bull.</i> , 1996, <b>44</b> , 1736 |

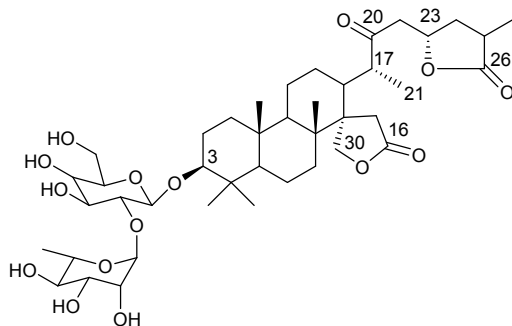

| Compound                                                                                                                                         | $\Delta$ | Source                       | Reference                                     |
|--------------------------------------------------------------------------------------------------------------------------------------------------|----------|------------------------------|-----------------------------------------------|
| 3B-O- $\alpha$ -L-rhamnopyranosyl-(1->2)- $\beta$ -D-glucopyranosyloxy-20-oxo-16,17-seco-21(20->17)-abeo-dammar-24-ene-16,18:26,23-diolide       | 24(25)   | <i>Alphitonia xerocarpus</i> | <i>Phytochemistry</i> , 2016, <b>129</b> , 45 |
| <b>(25S)</b> 3B-O- $\alpha$ -L-rhamnopyranosyl-(1->2)- $\beta$ -D-glucopyranosyloxy-20-oxo-16,17-seco-21(20->17)-abeo-dammar-16,18:26,23-diolide | -        | <i>Alphitonia xerocarpus</i> | <i>Phytochemistry</i> , 2016, <b>129</b> , 45 |
| <b>(25R)</b> 3B-O- $\alpha$ -L-rhamnopyranosyl-(1->2)- $\beta$ -D-glucopyranosyloxy-20-oxo-16,17-seco-21(20->17)-abeo-dammar-16,18:26,23-diolide | -        | <i>Alphitonia xerocarpus</i> | <i>Phytochemistry</i> , 2016, <b>129</b> , 45 |

**Table S18: 16,17-seco-Ursanes**

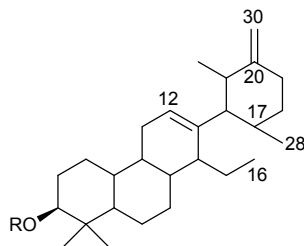

| Compound                                                             | R  | Source                    | Reference                                |
|----------------------------------------------------------------------|----|---------------------------|------------------------------------------|
| 16(17)-seco-urs-12,20(30) dien-18- $\alpha$ -H-3- $\beta$ -diol      | H  | <i>Hemidesmus indicus</i> | <i>Pharmazie</i> , 2001, <b>56</b> , 244 |
| 16(17)-seco-urs-12,20(30)-dien-18- $\alpha$ -H-3- $\beta$ yl acetate | Ac | <i>Hemidesmus indicus</i> | <i>Pharmazie</i> , 2001, <b>56</b> , 244 |

**Table S19: 17,18-*seco*-Lupane**

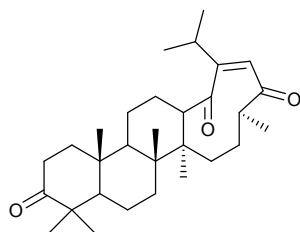

| Compound       | Source                      | Reference                                   |
|----------------|-----------------------------|---------------------------------------------|
| Officinatrione | <i>Taraxacum officinale</i> | <i>Tetrahedron</i> , 2013, <b>69</b> , 1583 |

**Table S20: 17,22-*seco*-Oleanane**

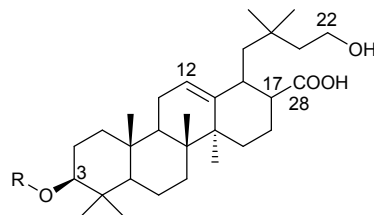

| Compound                                                                                                               | R                                                       | Source                         | Reference                                      |
|------------------------------------------------------------------------------------------------------------------------|---------------------------------------------------------|--------------------------------|------------------------------------------------|
| Steganogenin                                                                                                           | H                                                       | <i>Steganotaenia araliacea</i> | <i>Phytochemistry</i> , 1992, <b>31</b> , 3177 |
| 3-O-[[β-D-glucopyranosyl(1->2)-(β-D-glucopyranosyl(1->3))-(α-L-rhamnopyranosyl(1->4))-β-D-glucopyranosyl]-steganogenin | D-β-glc-(1->2)-(D-β-glc (1->3))-(L-α-rha(1->4))-D-β-glc | <i>Steganotaenia araliacea</i> | <i>Phytochemistry</i> , 1992, <b>31</b> , 3177 |

**Table S21: 17,22-*seco*-Ursane**

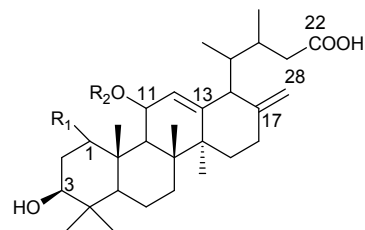

| Compound                                                                       | R <sub>1</sub> | R <sub>2</sub> | Source                                            | Reference                                               |
|--------------------------------------------------------------------------------|----------------|----------------|---------------------------------------------------|---------------------------------------------------------|
| 3β,11α-dihydroxy-17,22- <i>seco</i> -17(28),12-ursadien-22-oic acid            | H              | H              | <i>Salvia palaestina</i><br><i>Salvia syriaca</i> | <i>J. Asian Nat. Prod. Res.</i> , 2012, <b>14</b> , 618 |
| 1β,3β,11α-trihydroxy-17,22- <i>seco</i> -17(28),12-ursadien-22-oic acid        | OH             | H              | <i>Salvia syriaca</i>                             | <i>Nat. Prod. Res.</i> , 2015, <b>29</b> , 102          |
| 3β-hydroxy-11α-methoxy-17,22- <i>seco</i> -17(28),12-ursadien-22-oic acid      | H              | Me             | <i>Salvia syriaca</i>                             | <i>Nat. Prod. Res.</i> , 2015, <b>29</b> , 102          |
| 1β,3β-dihydroxy-11α-methoxy-17,22- <i>seco</i> -17(28),12-ursadien-22-oic acid | OH             | Me             | <i>Salvia syriaca</i>                             | <i>Nat. Prod. Res.</i> , 2015, <b>29</b> , 102          |

**Table S22: 18,19-*seco*-Ursanes**

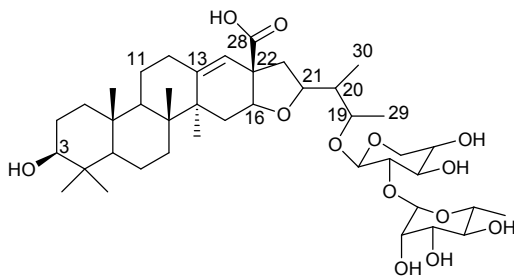

| Compound     | Source                 | Reference                                       |
|--------------|------------------------|-------------------------------------------------|
| Aculeoside I | <i>Ilex aculeolata</i> | <i>Nat. Prod. Lett.</i> , 2010, <b>16</b> , 137 |

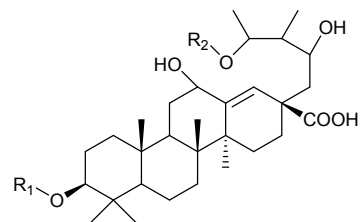

| Compound       | R <sub>1</sub>         | R <sub>2</sub> | Source                      | Reference                                       |
|----------------|------------------------|----------------|-----------------------------|-------------------------------------------------|
| Bodinoside F   | D-β-glucose            | D-β-glucose    | <i>Elsholtzia bodinieri</i> | <i>Phytochem. Lett.</i> , 2015, <b>12</b> , 308 |
| Cornutaoside B | D-β-glc-(1->2)-L-α-ara | H              | <i>Ilex cornuta</i>         | <i>Food Chem.</i> , 2008, <b>111</b> , 78       |

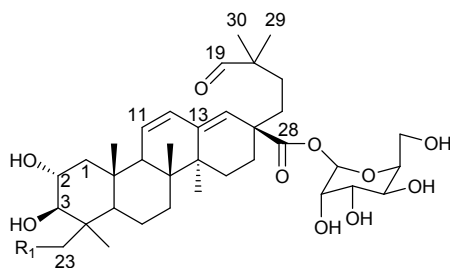

| Compound     | R <sub>1</sub> | Source                   | Reference                                  |
|--------------|----------------|--------------------------|--------------------------------------------|
| Arjunaside A | H              | <i>Terminalia arjuna</i> | <i>Planta Med.</i> , 2010, <b>76</b> , 903 |
| Arjunaside B | OH             | <i>Terminalia arjuna</i> | <i>Planta Med.</i> , 2010, <b>76</b> , 903 |

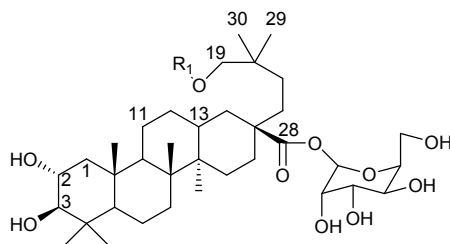

| Compound     | R <sub>1</sub> | Δ             | Source                   | Reference                                  |
|--------------|----------------|---------------|--------------------------|--------------------------------------------|
| Arjunaside C | H              | 11(12),13(18) | <i>Terminalia arjuna</i> | <i>Planta Med.</i> , 2010, <b>76</b> , 903 |

|              |    |               |                          |                                            |
|--------------|----|---------------|--------------------------|--------------------------------------------|
| Arjunaside D | H  | 13(18)        | <i>Terminalia arjuna</i> | <i>Planta Med.</i> , 2010, <b>76</b> , 903 |
| Arjunaside E | Me | 11(12),13(18) | <i>Terminalia arjuna</i> | <i>Planta Med.</i> , 2010, <b>76</b> , 903 |

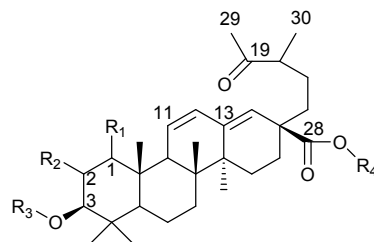

| Compound                                                             | R <sub>1</sub> | R <sub>2</sub> | R <sub>3</sub>                                    | R <sub>4</sub>                                                             | Source                   | Reference                                           |
|----------------------------------------------------------------------|----------------|----------------|---------------------------------------------------|----------------------------------------------------------------------------|--------------------------|-----------------------------------------------------|
| 18,19-seco-1b,2a,3a-trihydroxy-19-oxo-urs-11,13(18)-dien-28-oic acid | OH             | OH             | H                                                 | H                                                                          | <i>Rubus innominatus</i> | <i>Phytochemistry</i> , 2015, <b>116</b> , 329      |
| 18,19-seco-2a,3a-dihydroxyl-19-oxo-urs-11,13(18)-dien-28-oic acid    | H              | OH             | H                                                 | H                                                                          | <i>Toddalia asiatica</i> | <i>Nat. Prod. Res. Dev.</i> , 2005, <b>17</b> , 404 |
| llexoside A                                                          | H              | H              | L- $\alpha$ -arabinose                            | H                                                                          | <i>Ilex crenata</i>      | <i>Tetrahedron Lett.</i> , 1991, <b>32</b> , 3535   |
| llexoside B                                                          | H              | H              | D- $\beta$ -glucose-(1->3)-L- $\alpha$ -arabinose | H                                                                          | <i>Ilex crenata</i>      | <i>Tetrahedron Lett.</i> , 1991, <b>32</b> , 3535   |
| llexoside C                                                          | H              | H              | H                                                 | D- $\beta$ -xylose-(1->6)-D- $\beta$ -glucose                              | <i>Ilex crenata</i>      | <i>Tetrahedron Lett.</i> , 1991, <b>32</b> , 3535   |
| llexoside D                                                          | H              | H              | L- $\alpha$ -arabinose                            | D- $\beta$ -xylose-(1->6)-D- $\beta$ -glucose                              | <i>Ilex crenata</i>      | <i>Tetrahedron Lett.</i> , 1991, <b>32</b> , 3535   |
| llexoside E                                                          | H              | H              | L- $\alpha$ -arabinose                            | L- $\alpha$ -rhamnose-(1->2)-D- $\beta$ -xylose-(1->6)-D- $\beta$ -glucose | <i>Ilex crenata</i>      | <i>Tetrahedron</i> , 1991, 47, 7219                 |
| llexoside F                                                          | H              | H              | D- $\beta$ -glucose-(1->3)-L- $\alpha$ -arabinose | L- $\alpha$ -rhamnose-(1->2)-D- $\beta$ -xylose-(1->6)-D- $\beta$ -glucose | <i>Ilex crenata</i>      | <i>Tetrahedron</i> , 1991, 47, 7219                 |

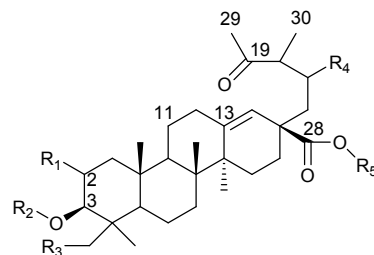

| Compound       | R <sub>1</sub> | R <sub>2</sub>                                                      | R <sub>3</sub> | R <sub>4</sub> | R <sub>5</sub>      | Source                      | Reference                                       |
|----------------|----------------|---------------------------------------------------------------------|----------------|----------------|---------------------|-----------------------------|-------------------------------------------------|
| Ilexoside G    | H              | L- $\alpha$ -arabinose                                              | H              | H              | H                   | <i>Ilex crenata</i>         | <i>Tetrahedron</i> , 1991, <b>47</b> , 7219     |
| Ilexoside H    | H              | D- $\beta$ -glucose-(1- $\rightarrow$ 3)-<br>L- $\alpha$ -arabinose | H              | H              | H                   | <i>Ilex crenata</i>         | <i>Tetrahedron</i> , 1991, <b>47</b> , 7219     |
| Ilexoside I    | H              | D- $\beta$ -glucose-(1- $\rightarrow$ 3)-<br>L- $\alpha$ -arabinose | H              | H              | D- $\beta$ -glucose | <i>Ilex crenata</i>         | <i>Tetrahedron</i> , 1991, <b>47</b> , 7219     |
| Bodinoside A   | OH             | D- $\beta$ -glucose                                                 | H              | OH             | H                   | <i>Elsholtzia bodinieri</i> | <i>Helv. Chim. Acta</i> , 2005, <b>88</b> , 252 |
| Bodinoside B   | H              | D- $\beta$ -glucose                                                 | H              | OH             | H                   | <i>Elsholtzia bodinieri</i> | <i>Helv. Chim. Acta</i> , 2005, <b>88</b> , 252 |
| Bodinoside E   | OH             | D- $\beta$ -glucose                                                 | OH             | H              | D- $\beta$ -glucose | <i>Elsholtzia bodinieri</i> | <i>Helv. Chim. Acta</i> , 2005, <b>88</b> , 252 |
| Bodinoside G   | OH             | D- $\beta$ -glucose                                                 | H              | OH             | H                   | <i>Elsholtzia bodinieri</i> | <i>Helv. Chim. Acta</i> , 2005, <b>88</b> , 252 |
| Cornutaoside A | H              | D- $\beta$ -glucose-(1- $\rightarrow$ 3)-<br>L- $\alpha$ -arabinose | H              | OH             | H                   | <i>Ilex cornuta</i>         | <i>Food Chem.</i> , 2008, <b>111</b> , 78       |
